# Supplementary material for: Effectiveness of a novel gene nanotherapy based on putrescine for cancer treatment
Source: Royal Society of Chemistry journal article supplement (doi:10.1039/d2bm01456d), 2023-01-01

Electronic Supplementary Material (ESI) for Biomaterials Science.

This journal is © The Royal Society of Chemistry 2023

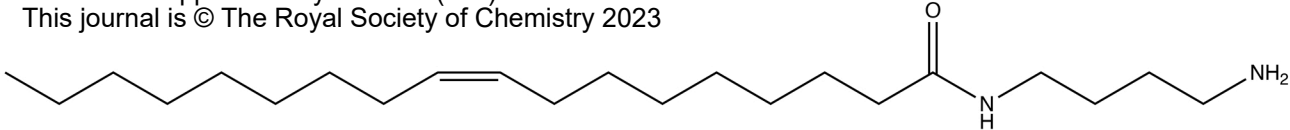

Supplement: d2bm01456d2.pdf [file d2bm01456d2.pdf]
