# Supplementary figures and images for: Effectiveness of a novel gene nanotherapy based on putrescine for cancer treatment
Source: Royal Society of Chemistry journal article supplement (doi:10.1039/d2bm01456d), 2023-01-01

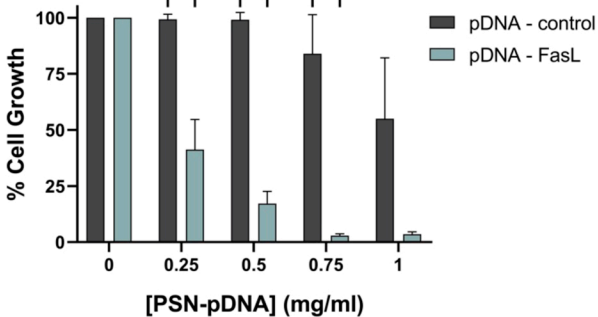

Supplement: d2bm01456d10.pdf [file d2bm01456d10.pdf]

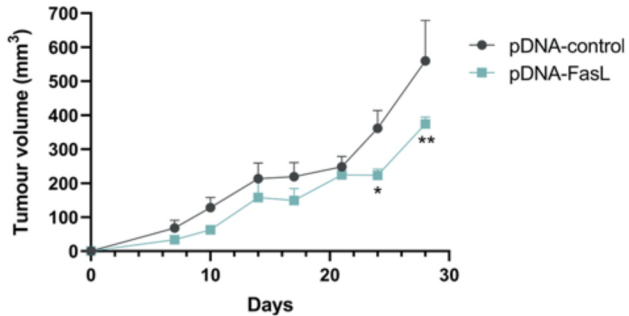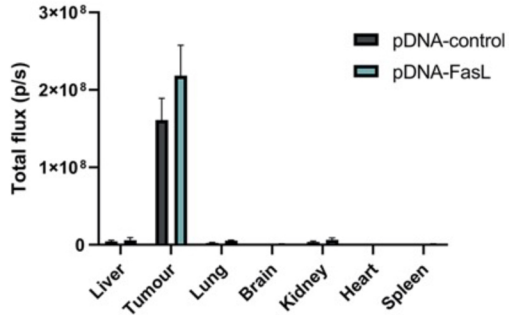

Supplement: d2bm01456d11.pdf [file d2bm01456d11.pdf]

Liver

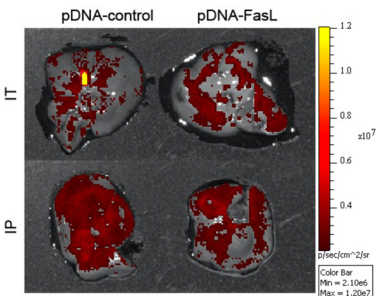

Tumour

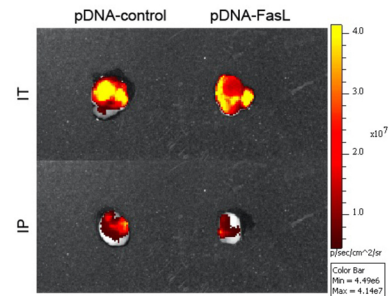

Kidney

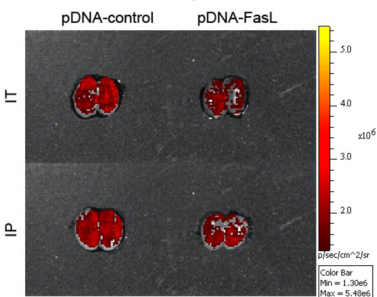

Heart

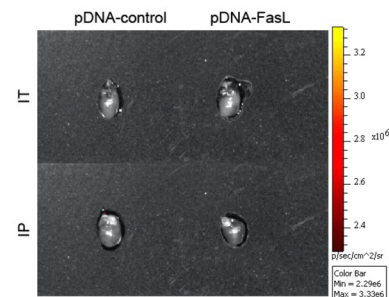

Lung

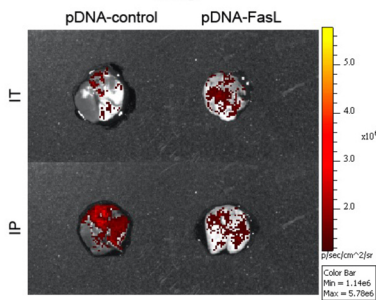

Brain

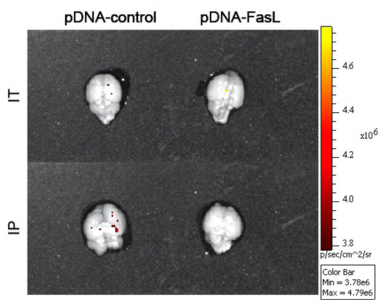

Spleen

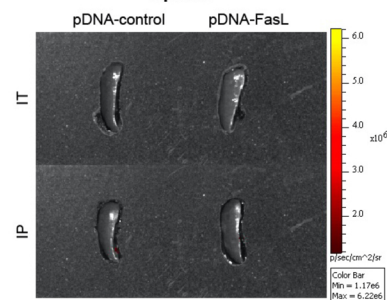

Supplement: d2bm01456d3.pdf [file d2bm01456d3.pdf]

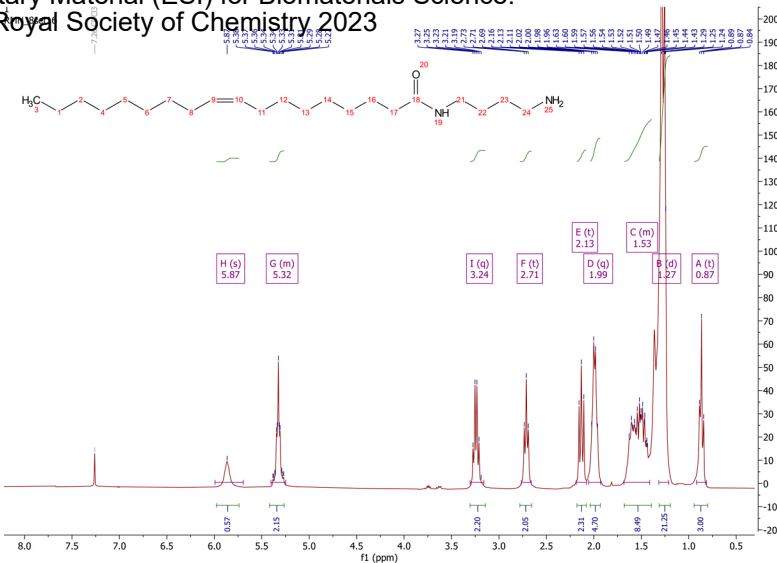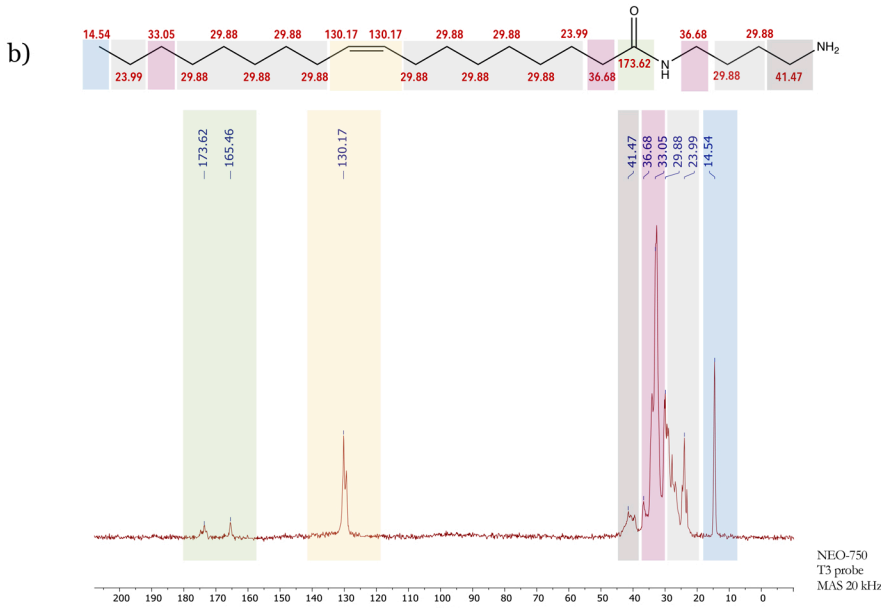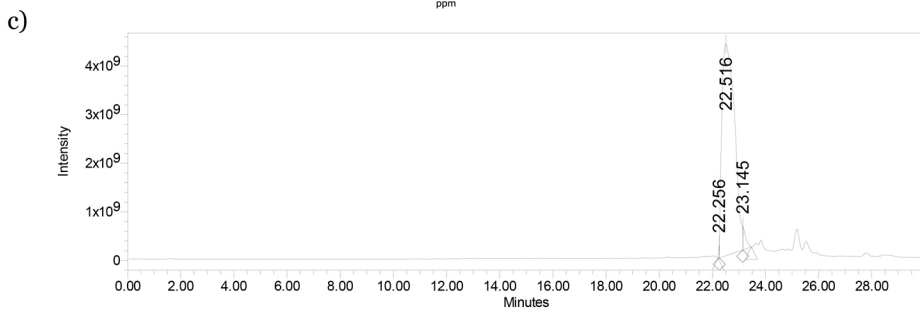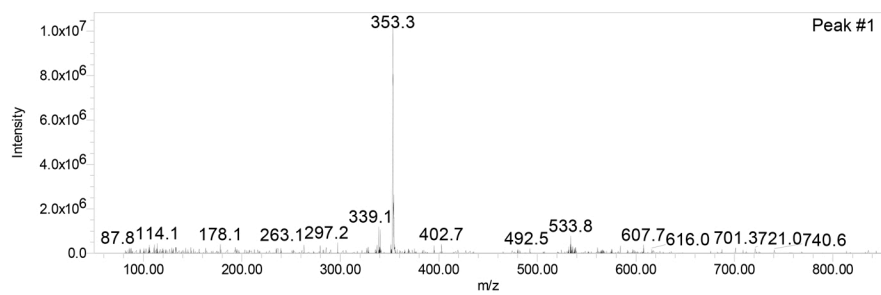

Supplement: d2bm01456d4.pdf [file d2bm01456d4.pdf]

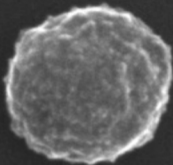

100 nm

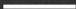

Supplement: d2bm01456d5.pdf [file d2bm01456d5.pdf]

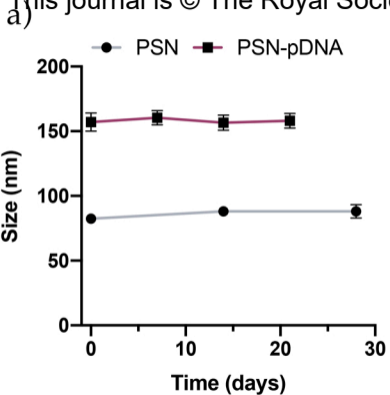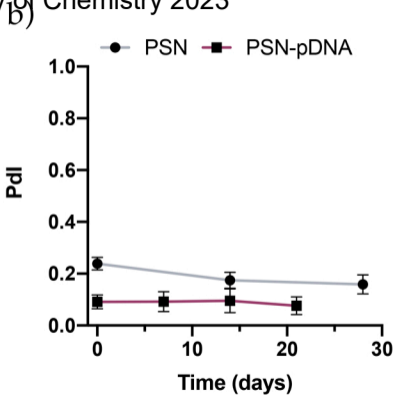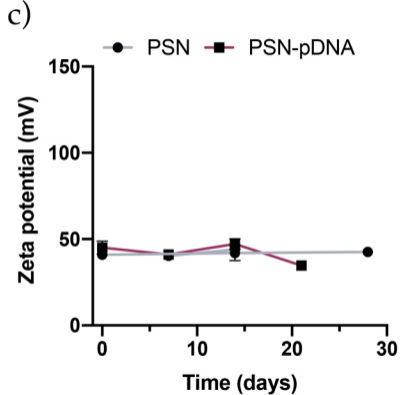

Supplement: d2bm01456d6.pdf [file d2bm01456d6.pdf]

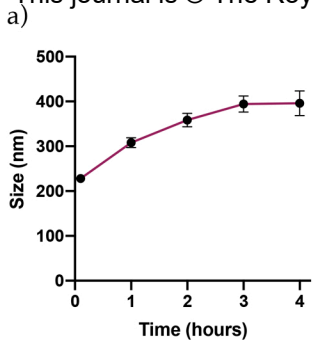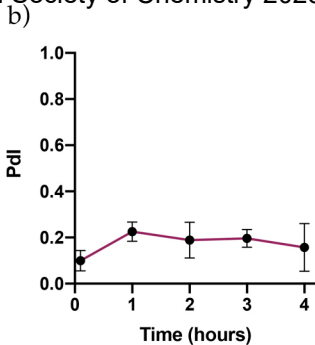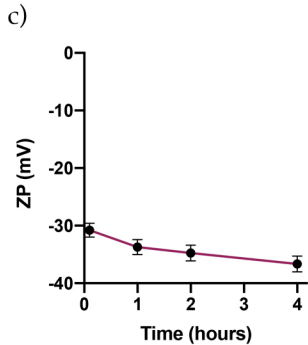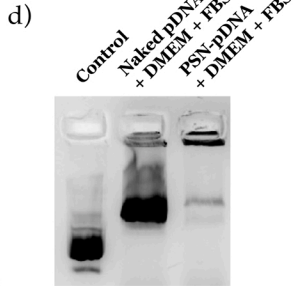

Supplement: d2bm01456d7.pdf [file d2bm01456d7.pdf]

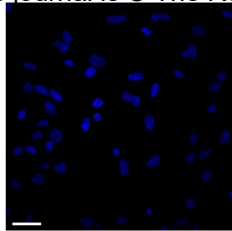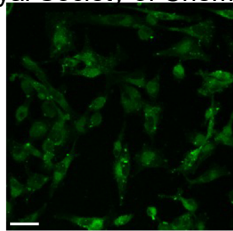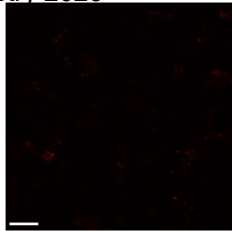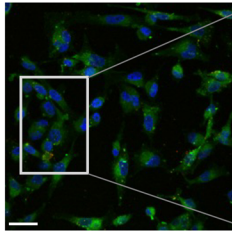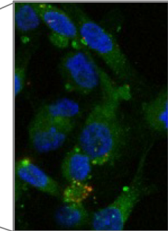

Supplement: d2bm01456d8.pdf [file d2bm01456d8.pdf]
